# Supplementary material
Source: Research Square preprint supplement (doi:10.21203/rs.3.rs-8862564/v1)
Supplement: Supplementary file 1 [file 78ee17998680d0593ad893f9.docx]

**Table 1. Socio-Economic & Demographic Profile of respondents**

| Variables | Categories | Nuclear Family (N=193) | | Joint Family (N=141) | |
| --- | --- | --- | --- | --- | --- |
| **Frequency** | **Percentage** | **Frequency** | **Percentage** |
| Age of Marriage | Below 20  Between 21 and 25  Between 26 and 30  Between 31 and 35 | 0  39  103  51 | 0  20.2  53.4  26.4 | 1  32  67  41 | 0.7  22.7  47.5  29.1 |
| Educational Qualification | Graduation  Postgraduation  Doctorate and above | 57  70  66 | 29.5  36.3  34.2 | 47  58  36 | 33.3  41.1  25.5 |
| Type of Institution | Government  Private | 91  102 | 47.2  52.8 | 68  73 | 48.2  51.8 |
| Employment  Status | Full-time  Part-time  Self Employed | 123  32  38 | 63.7  16.6  19.7 | 94  17  30 | 66.7  12.1  21.3 |
| Total Work Experience | Below 2 years  3-6 years  7-10 years  Above 11 | 24  97  49  23 | 12.4  50.3  25.4  11.9 | 16  60  46  19 | 11.3  42.6  32.6  13.5 |
| Income per Annum | Below ₹1lakh  1-3 lakh  3-7 lakh  Above 7 lakh | 5  7  47  134 | 2.6  3.6  24.4  69.4 | 9  2  26  104 | 6.4  1.4  18.4  73.8 |
| Source(s): Authors’ own work | | | | | |

(Note: N = Number of Respondents)

**Table 2.** **Independent Samples t-Tests to Compare Autonomy in Decision to Parenthood by Family Structure**

| Factors | Nuclear Family  M SD | | Joint Family  M SD | | 95% CI  t(df) p LL UL | | | |
| --- | --- | --- | --- | --- | --- | --- | --- | --- |
| ADP1- Becoming a mother is something I personally want, not something others expect of me. | 6.27 | 0.93 | 3.79 | 2.31 | 13.56 (332) | < .001 | 2.13 | 2.85 |
| ADP2- I can delay having children to focus on my career, even though they are important to me. | 6.18 | 0.89 | 3.84 | 2.26 | 13.10 (332) | < .001 | 1.99 | 2.70 |
| ADP3- The decision to have a child should be made equally between my partner and me. | 6.27 | 0.93 | 3.61 | 2.48 | 13.63 (332) | < .001 | 2.28 | 3.04 |
| ADP4- Reliable childcare is essential for me to decide when to have a child. | 6.30 | 0.87 | 3.52 | 2.44 | 14.57 (332) | < .001 | 2.40 | 3.15 |
| ADP5- I feel pressure from others (e.g., family, relatives, community) to have a child soon. | 5.75 | 1.55 | 3.57 | 2.30 | 10.36 (332) | < .001 | 1.77 | 2.60 |
| ADP6- I feel confident about balancing work and family responsibilities if I decide to have a child. | 5.64 | 1.20 | 3.97 | 2.03 | 9.38 (332) | < .001 | 1.32 | 2.02 |
| Source(s): Authors’ own work | | | | | | | | |

(Note: M = mean; SD = standard deviation; CI = confidence interval; LL = lower limit; UL = upper limit. All tests are two-tailed.)

**Table 3.** **Multivariate Effects of Family Structure, Educational Qualification, and Their Interaction on Maternity Protection and Policy at the Workplace**.

| Effect | Test Statistic | Value | F | df | p | η² |
| --- | --- | --- | --- | --- | --- | --- |
| Family Structure | Pillai’s Trace | .276 | 15.30 | 8, 321 | < .001 | .276 |
| Educational Qualification | Pillai’s Trace | .254 | 5.86 | 16, 644 | < .001 | .127 |
| Family Structure x Educational Qualification | Pillai’s Trace | .111 | 2.38 | 16, 644 | .002 | .056 |
| Source(s): Authors’ own work | | | | | | |

(Note: F=F-statistic; df=Degrees of freedom; p=Significance level; η²=partial eta squared)

**Table 4.** **Tests of Between-Subjects Effects for Family Structure, Educational Qualification on Maternity Protection and Policy at the Workplace**

| Variables | Source | F | p | η² |
| --- | --- | --- | --- | --- |
| 1. There is availability and awareness about the Crèche facility in my workplace. | Family Structure  Educational Qualification  Family Structure × Educational Qualification | 12.38  20.18  4.67 | < .001  < .001  .010 | .036  .110  .028 |
| 2. There is access to Maternity Leave in my workplace. | Family Structure  Educational Qualification  Family Structure x Educational Qualification | 62.09  0.85  12.20 | < .001  .430  < .001 | .159  .005  .069 |
| 3. I have awareness regarding the Duration and Compensation of Maternity Leave. | Family Structure  Educational Qualification  Family Structure x Educational Qualification | 52.41  1.37  8.97 | < .001  .255  < .001 | .138  .008  .052 |
| 4. There is Job Security and Reintegration After Maternity Leave in my workplace. | Family Structure  Educational Qualification  Family Structure x Educational Qualification | 56.63  2.69  8.73 | < .001  .070  < .001 | .147  .016  .051 |
| 5. There is an Availability of Supportive Policies and Facilities in my workplace. | Family Structure  Educational Qualification  Family Structure x Educational Qualification | 68.41  0.60  5.70 | < .001  .548  .004 | .173  .004  .034 |
| 6. The Perception of Workplace Culture and Attitudes is positive. | Family Structure  Educational Qualification  Family Structure x Educational Qualification | 96.69  1.58  1.42 | < .001  .209  .243 | .228  .010  .009 |
| 7. There is a Provision for adoptive and commissioning mothers in my workplace. | Family Structure  Educational Qualification  Family Structure x Educational Qualification | 48.40  0.33  0.28 | < .001  .721  .759 | .129  .002  .002 |
| 8. I am satisfied with the government’s decision to increase maternity leave and benefits from 12 weeks to 26 weeks. | Family Structure  Educational Qualification  Family Structure x Educational Qualification | 38.59  4.45  5.77 | < .001  .012  .003 | .105  .026  .034 |
| Source(s): Authors’ own work | | | | |

(Note: F=F-statistic; p=Significance level; η²=partial eta squared)
