# Supplementary material
Source: Research Square preprint supplement (doi:10.21203/rs.3.rs-8862564/v1)
Supplement: Supplementary file 2 [file cda51a3ef379ff695d858058.docx]

**APPENDIX**

**Informed consent**

1. Title of Study: **Navigating Motherhood: How Family Structure and Maternity Support Shape Reproductive Choices of Working Women in India.**

2. Purpose of the study: The aim of the study is to understand the impact of reproductive choice, i.e. when to have children, when not to have children, the number of children and methods of having children on married working women of India and how this decision is impacted by the role of organization and family structure.

3. Participation Criteria:

- Married working women.
- Aged between 21 and 40 years.
- Women currently employed in organized sector, either in the government sector or the private sector.

4. Voluntary participation: Your participation in this study is completely voluntary. You may choose not to participate or withdraw at any time.

5. Confidentiality: No personal details (such as name, address, or phone number) will be collected. All the responses will be used solely for research purposes.

6. Consent Statement

By clicking “I Agree”, you confirm that:

- You have read and understood the information provided.
- You voluntarily agree to participate.

I agree [ ]

Your participation in this study is crucial, as it will provide valuable insights into the challenges and strategies women like you use to manage work and family responsibilities.

Thank you for your participation!!
